# Supplementary material for: Insights into the Effect of Curcumin and (–)-Epigallocatechin-3-Gallate on the Aggregation of Aβ(1–40) Monomers by Means of Molecular Dynamics
Source: MDPI journal article supplement (doi:10.3390/ijms21155462), 2020-07-30
Supplement: s1 [file s1]

# Insights into the effect of Curcumin and (-)-epigallocatechin-3-gallate on the aggregation of A $\beta$ (1-40) monomers by means of molecular dynamics

Francesco Tavanti<sup>a,b,\*</sup>, Alfonso Pedone<sup>b</sup> and Maria Cristina Menziani<sup>b</sup>

<sup>a</sup> CNR-NANO Research Center S3, Via Campi 213/a, 41125 Modena, Italy

<sup>b</sup> Department of Chemical and Geological Sciences, University of Modena and Reggio Emilia, Via Campi 103, 41125, Modena, Italy

\* Correspondence: \*To whom correspondence should be addressed. E-mail: francesco.tavanti@nano.cnr.it

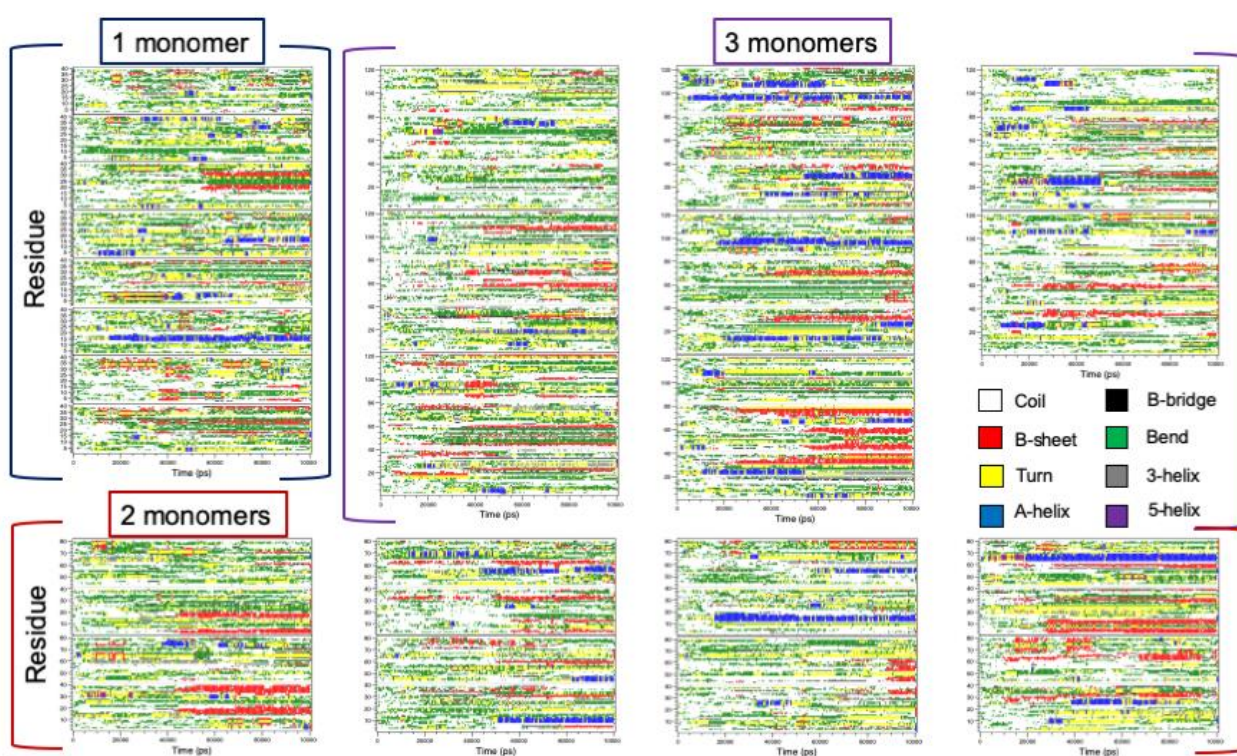

**Figure S 1:** Time evolution of the secondary structure for each residue of the A $\beta$ -amyloid monomeric, dimeric, and trimeric models obtained using the DSSP software for the eight REST simulations. Each color represents a different secondary structure as explained in the legend on the right.

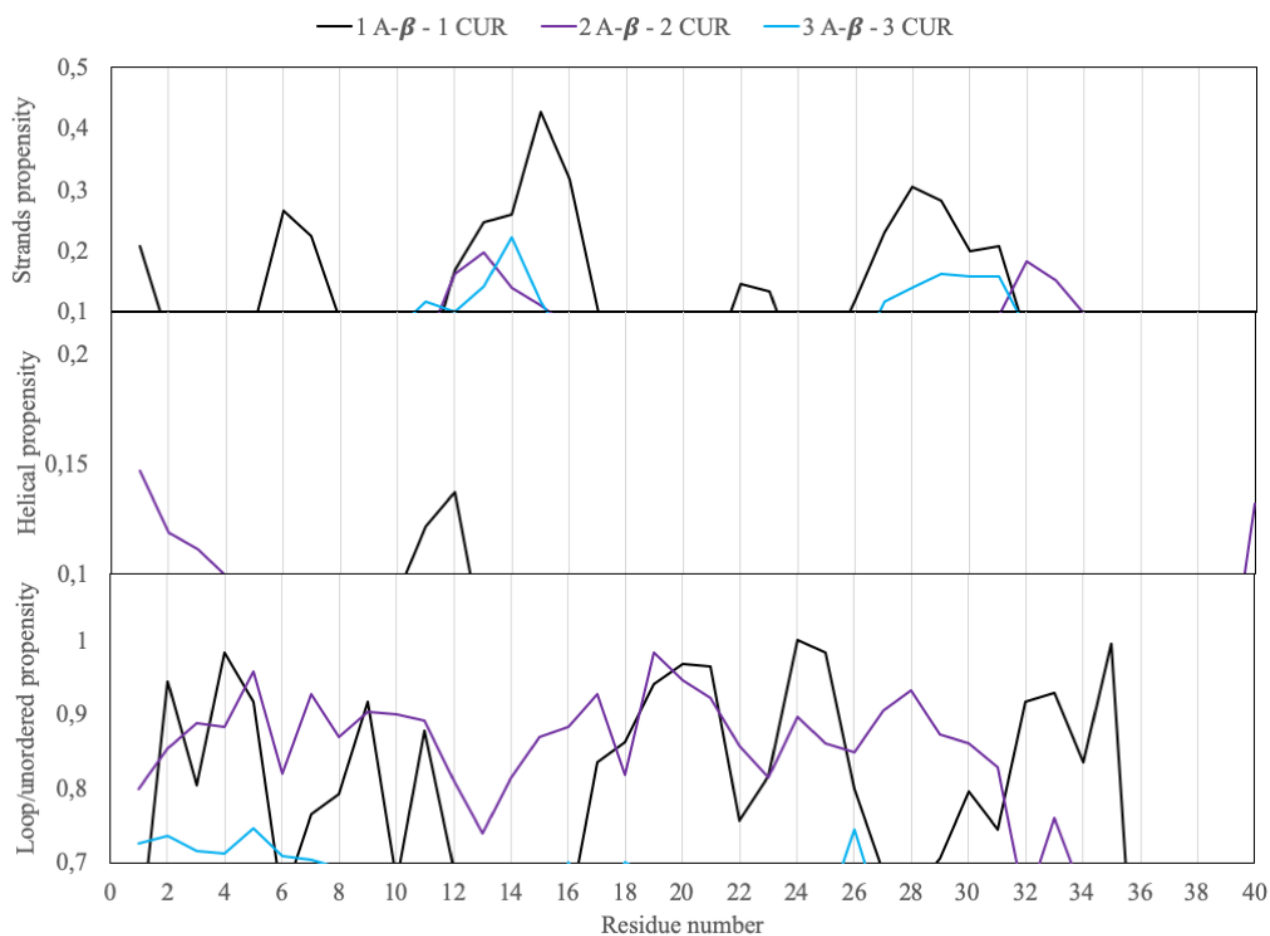

**Figure S 2:** secondary structure propensity for A $\beta$  monomers interacting with CUR.

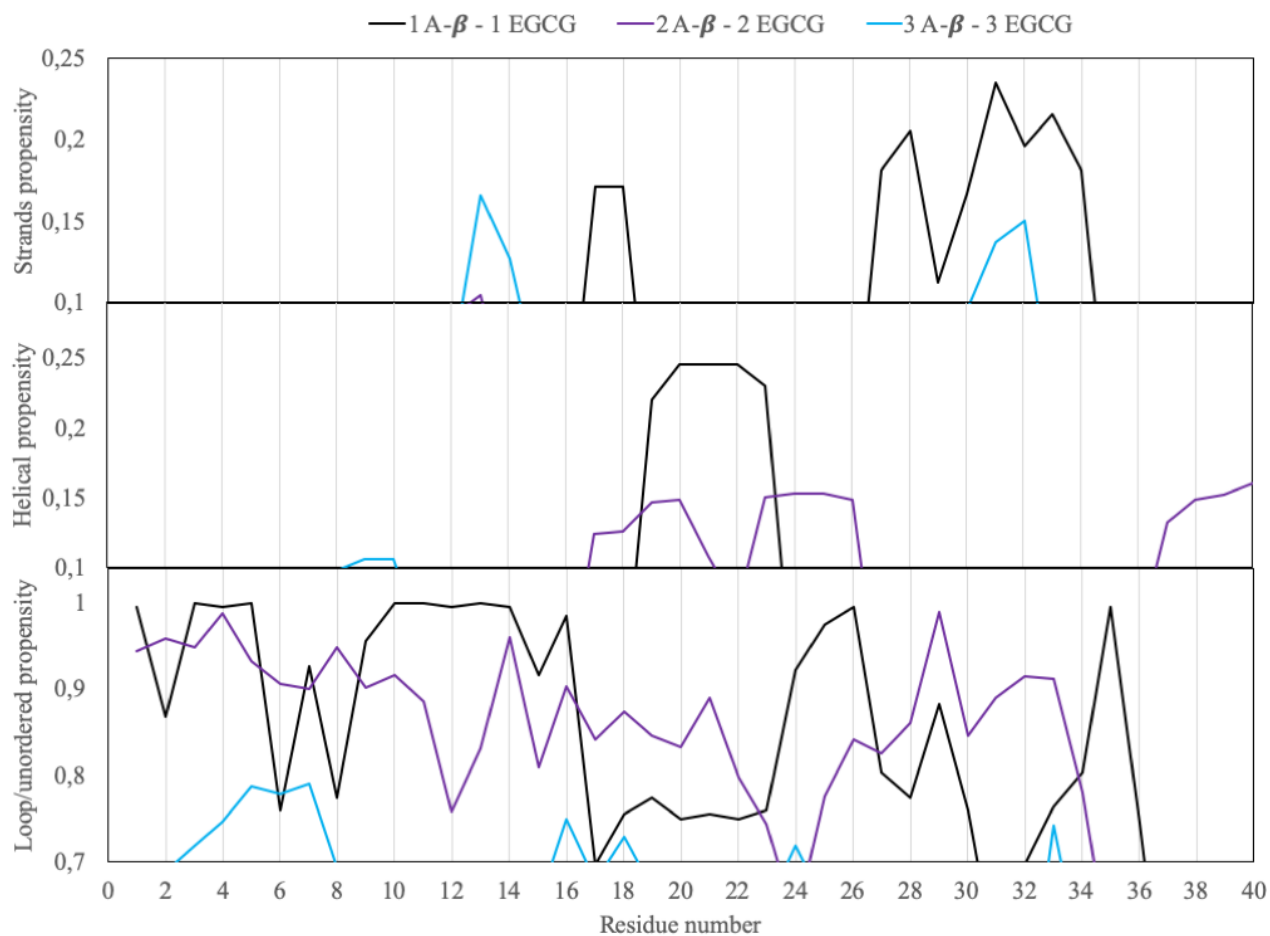

**Figure S 3:** secondary structure propensity for Aβ monomers interacting with EGCG.

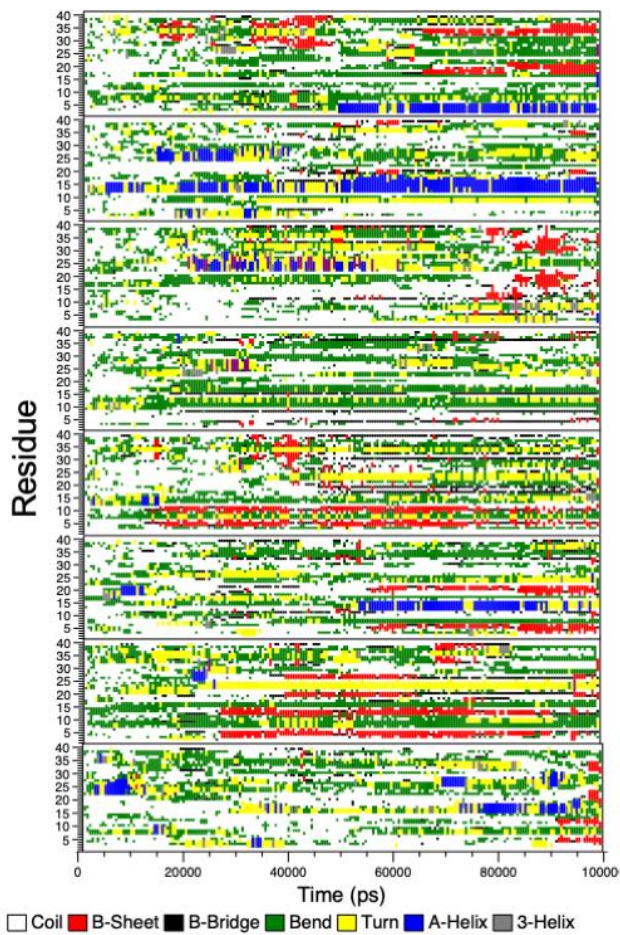

**Figure S 4:** Secondary structure assignment of the single monomer for each residue obtained using the DSSP software for the eight REST simulations. Each color represents a different secondary structure as explained in the legend at the bottom. Monomers + CUR.



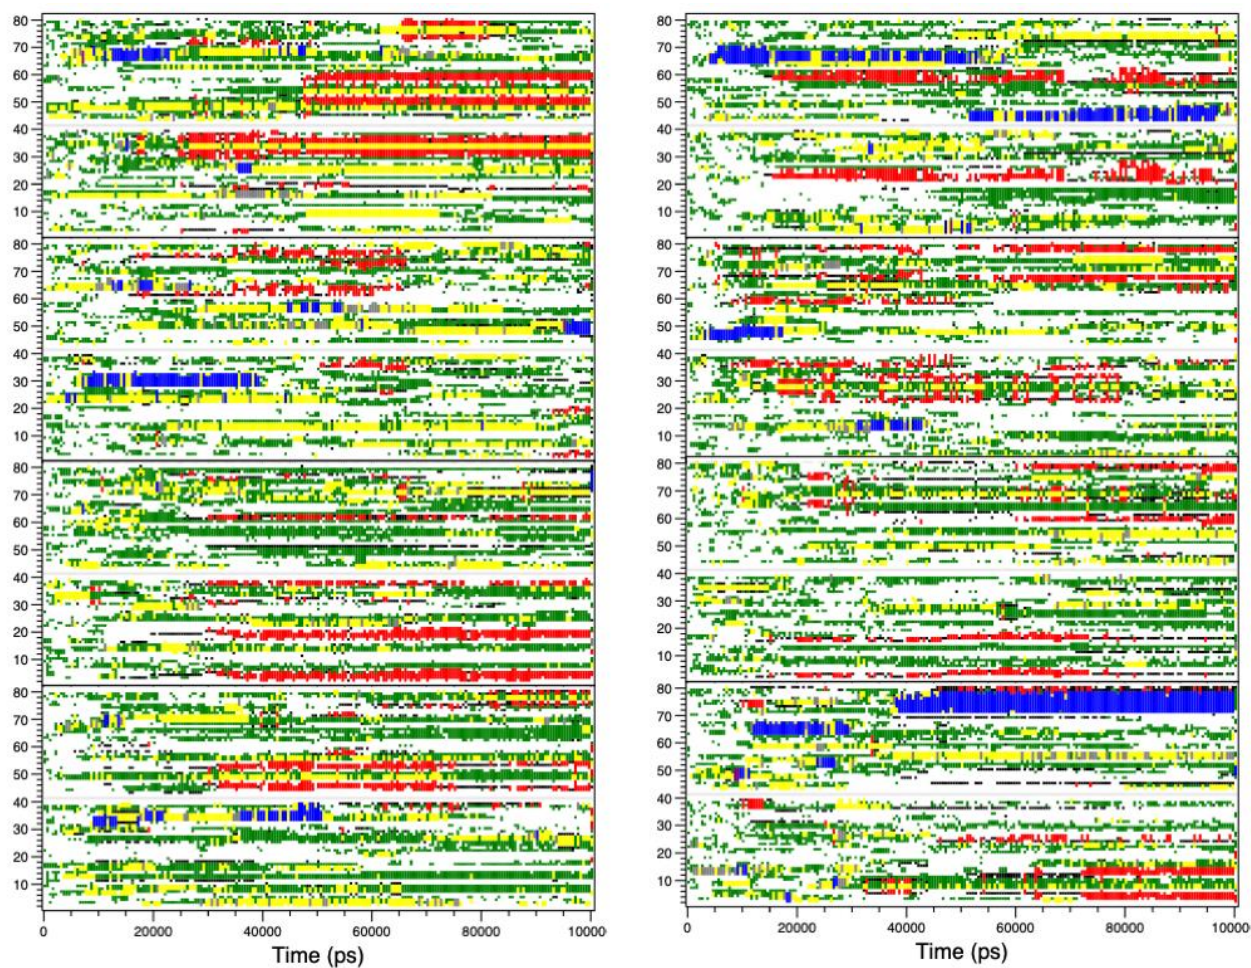

**Figure S 5:** Secondary structure assignment of two monomers for each residue obtained using the DSSP software for the eight REST simulations. Each color represents a different secondary structure as explained in the legend at the bottom. Monomers + CUR

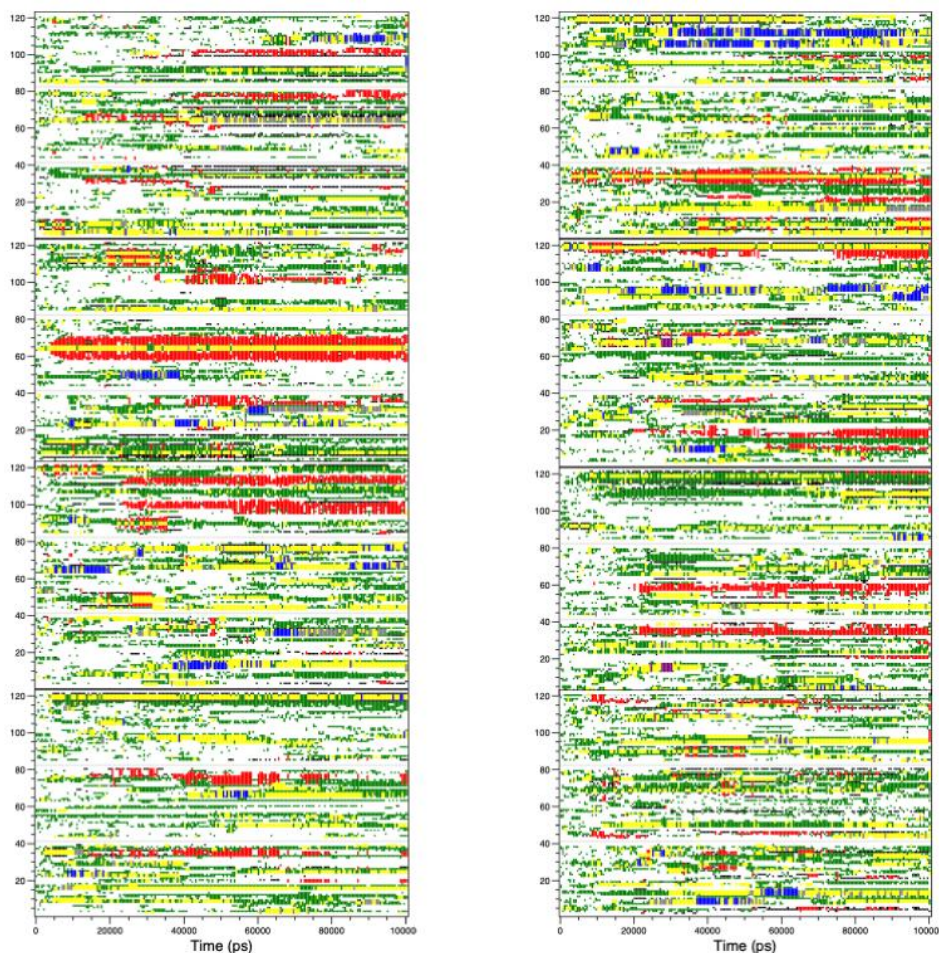

**Figure S 6:** Secondary structure assignment of three monomers for each residue obtained using the DSSP software for the eight REST simulations. Each color represents a different secondary structure as explained in the legend at the bottom. Monomers + CUR



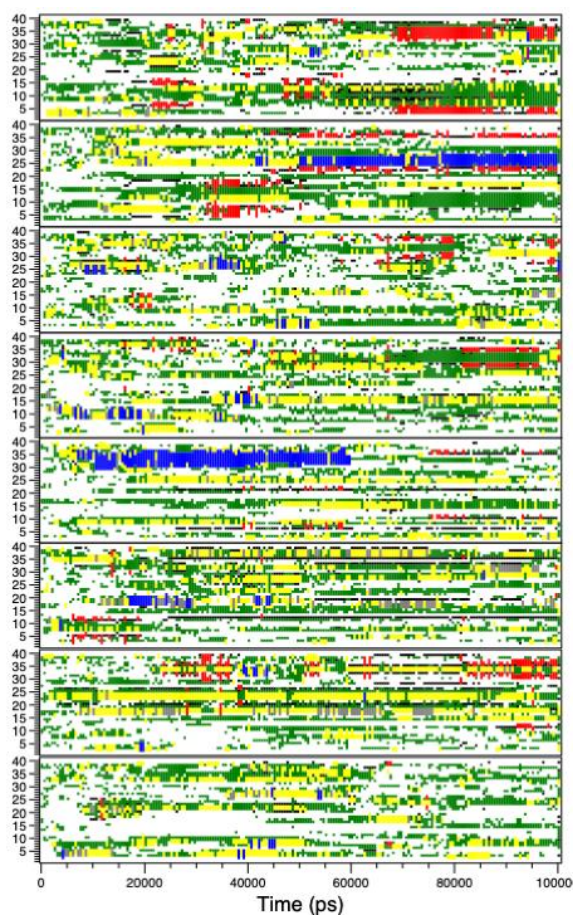

**Figure S 7:** Secondary structure assignment of the single monomer for each residue obtained using the DSSP software for the eight REST simulations. Each color represents a different secondary structure as explained in the legend at the bottom. Monomers + EGCG

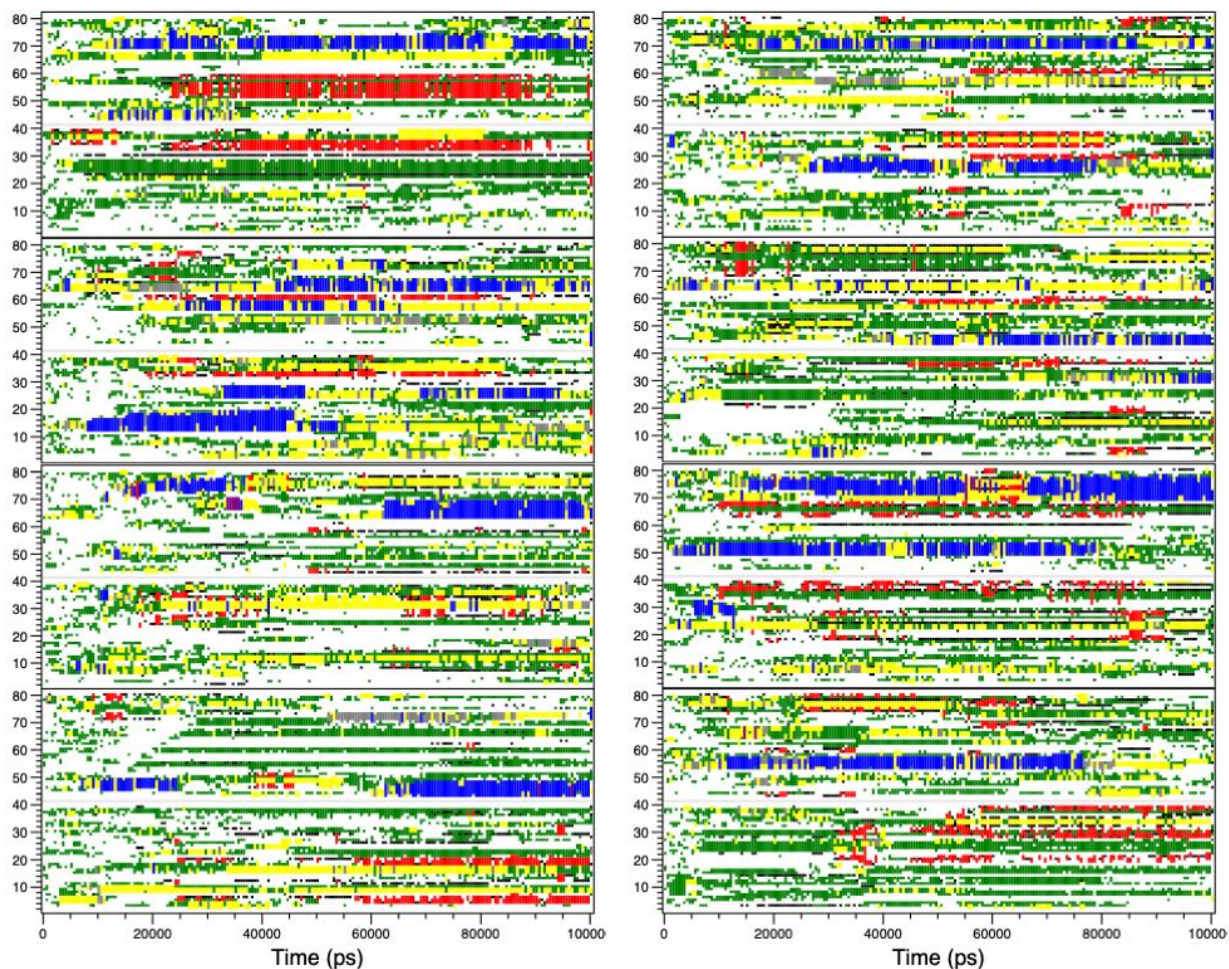

**Figure S 8:** Secondary structure assignment of two monomers for each residue obtained using the DSSP software for the eight REST simulations. Each color represents a different secondary structure as explained in the legend at the bottom. Monomers + EGCG



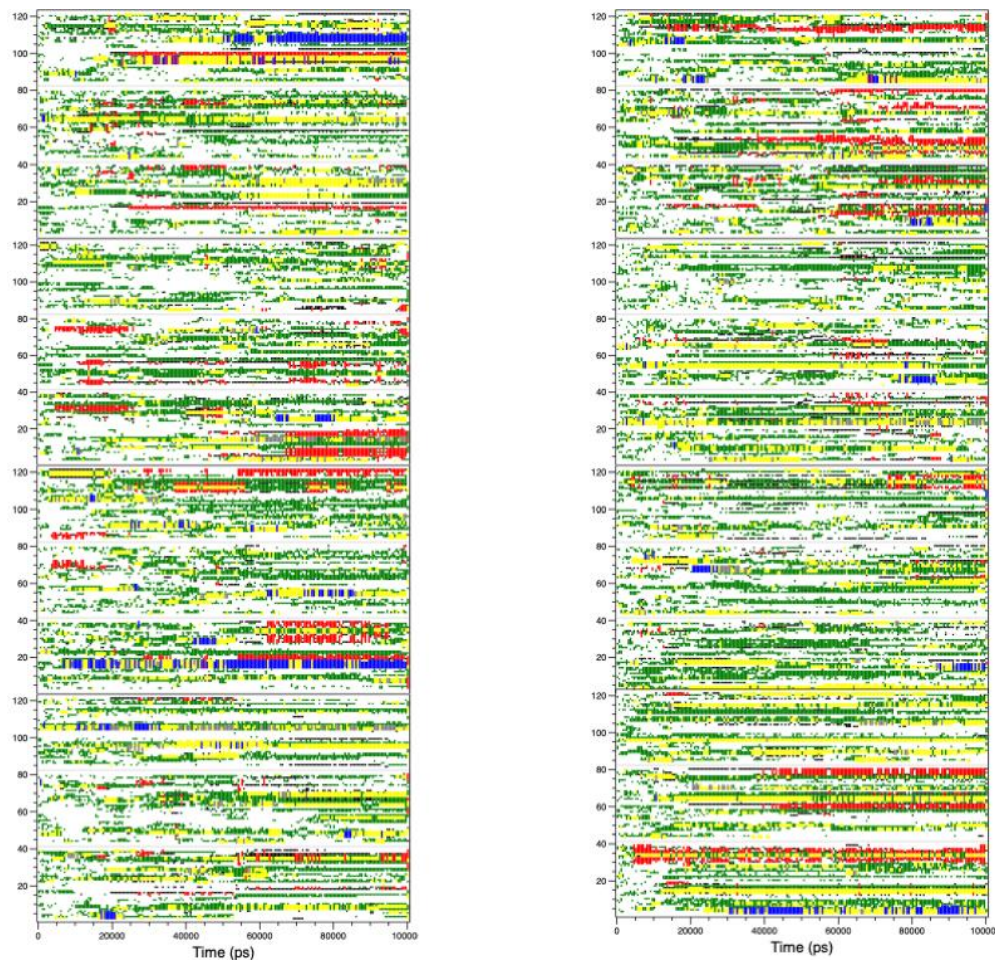

**Figure S 9:** Secondary structure assignment of three monomers for each residue obtained using the DSSP software for the eight REST simulations. Each color represents a different secondary structure as explained in the legend at the bottom. Monomers + EGCG
